# Supplementary material
Source: PubMed Central journal article supplement (PMC3374131)

**Fig. S1**

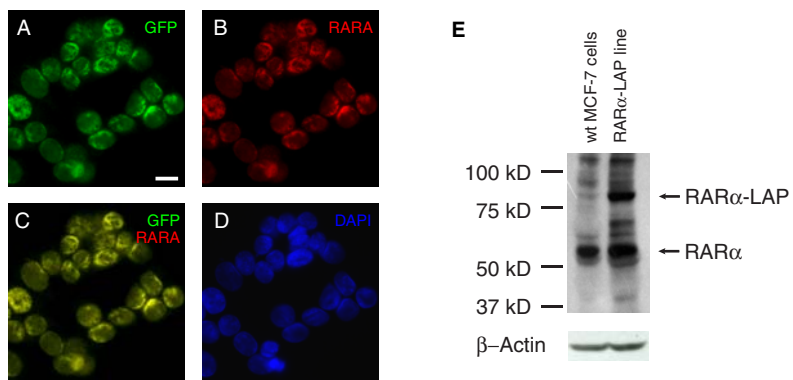

Fig. S2

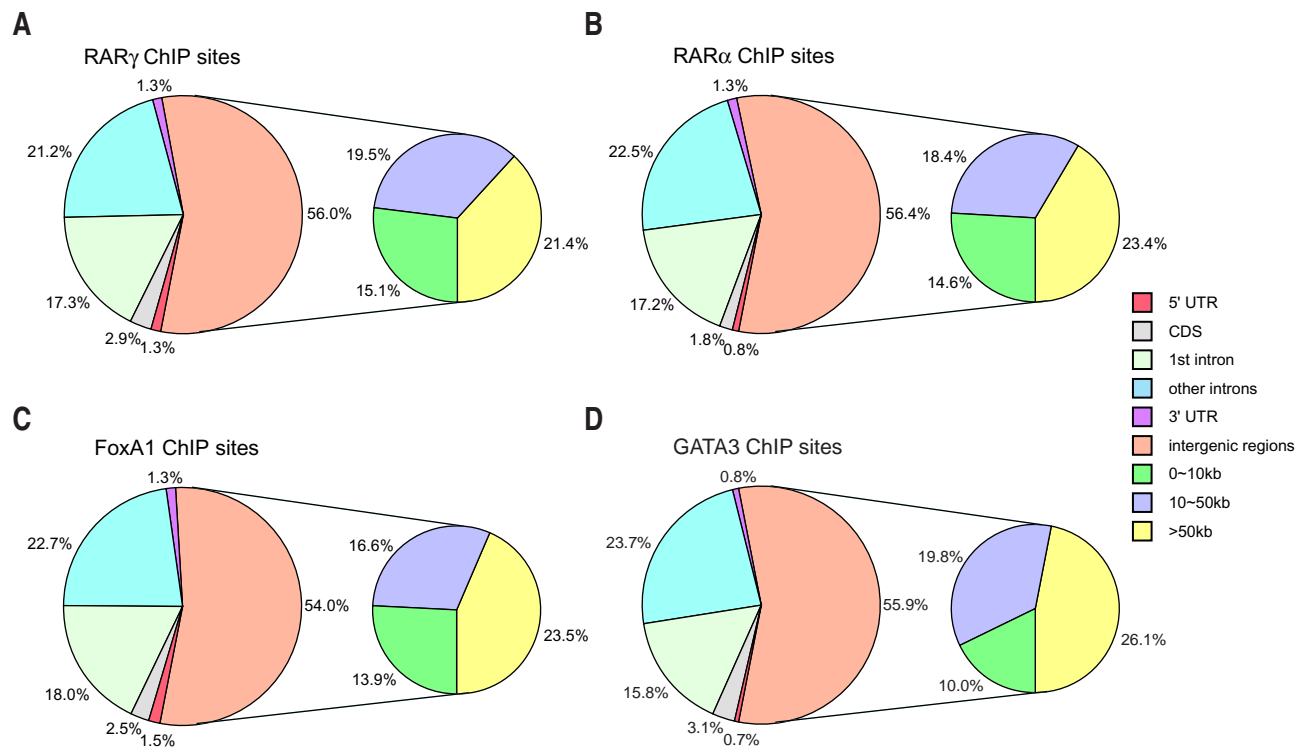

**Fig. S3**

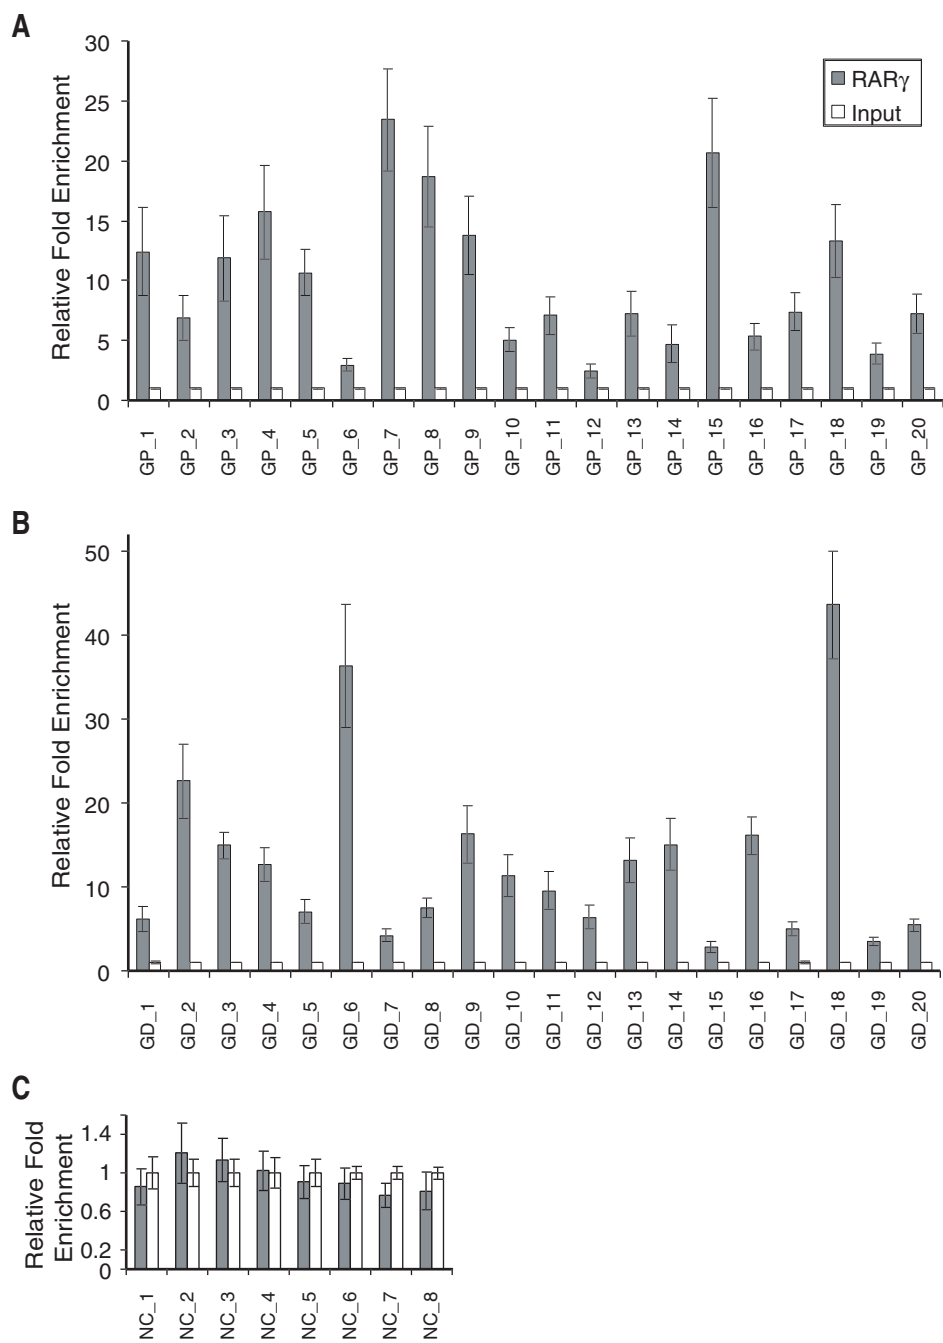

Fig. S4

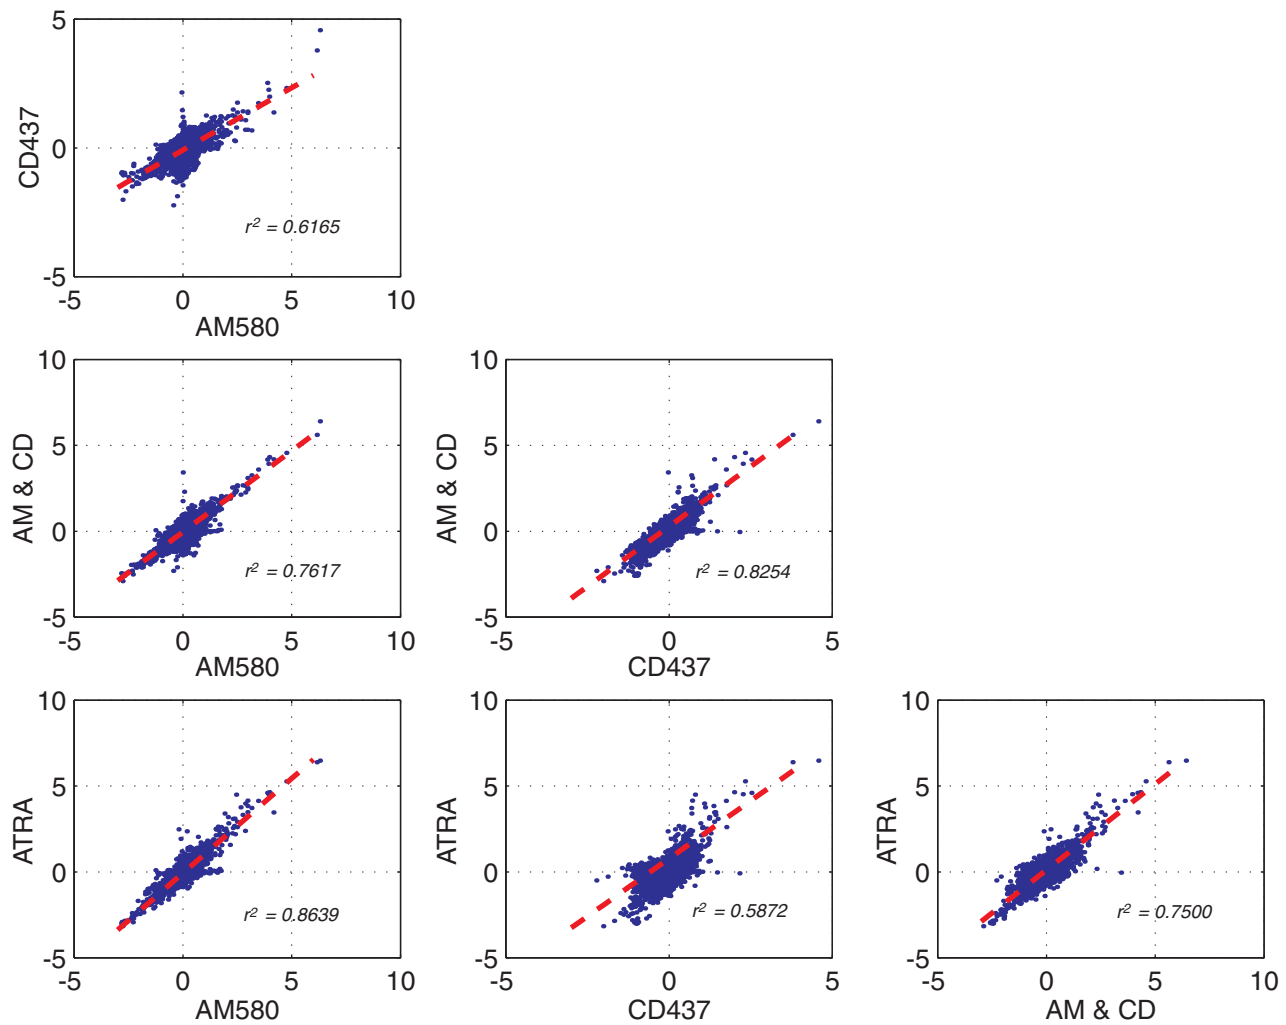

**Fig. S5**

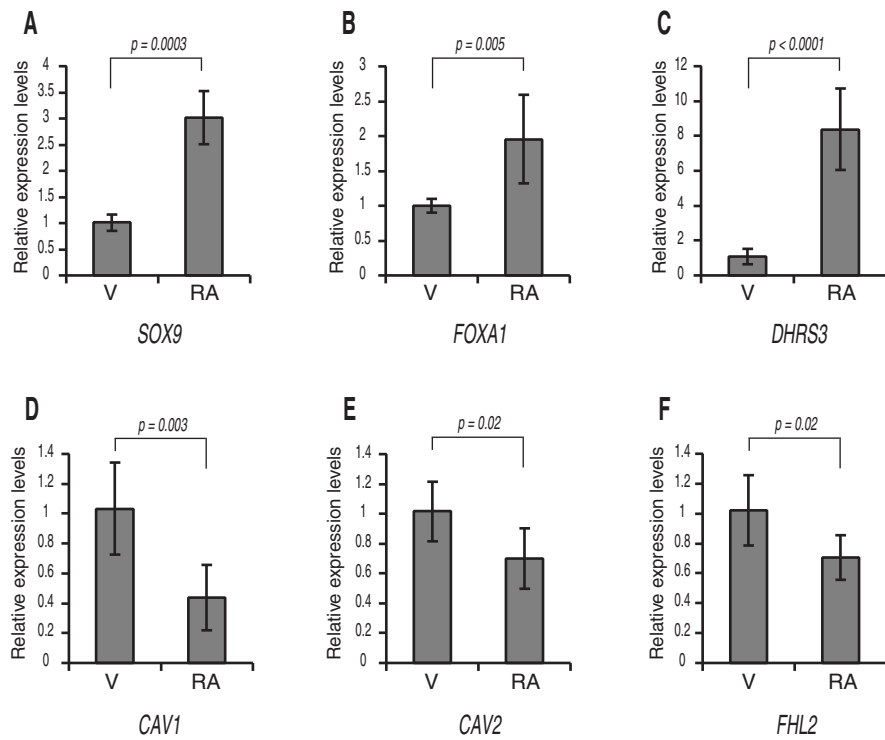

Fig. S6

**A**

**RAR and ER $\alpha$  common targets**

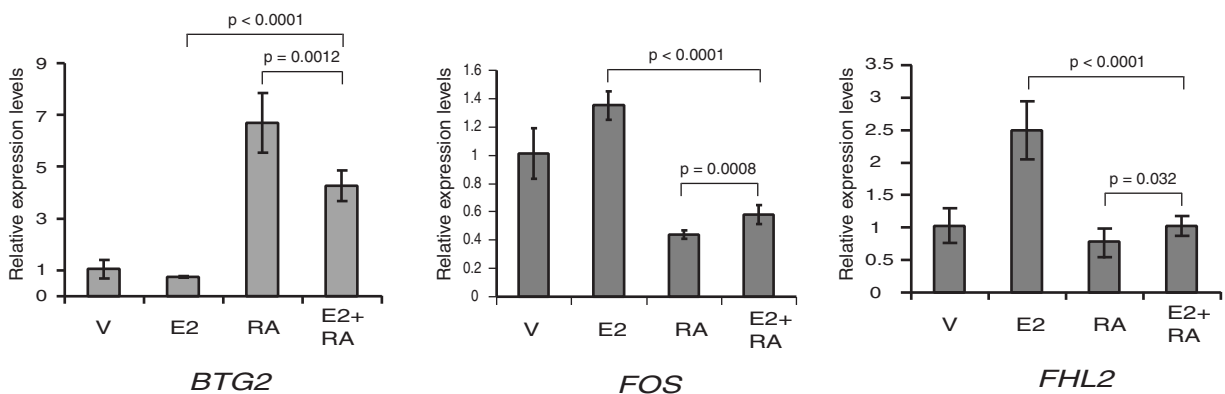

**B**

**ER $\alpha$  direct targets only**

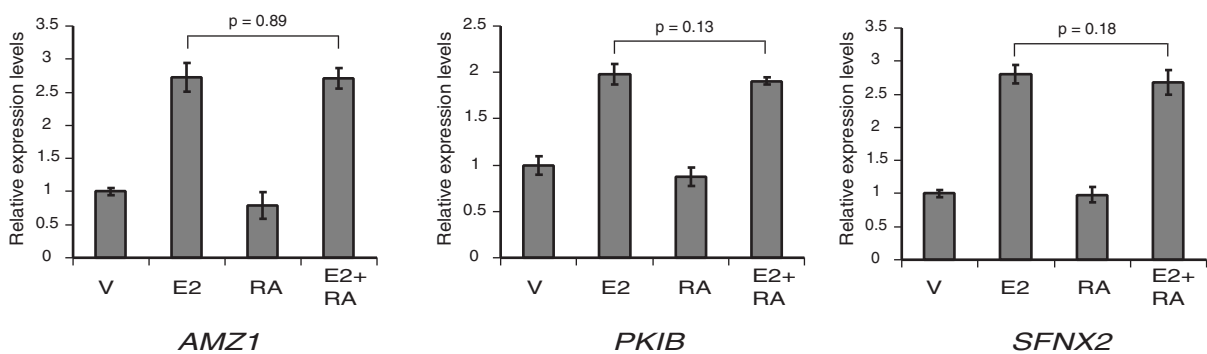

**C**

**RAR direct targets only**

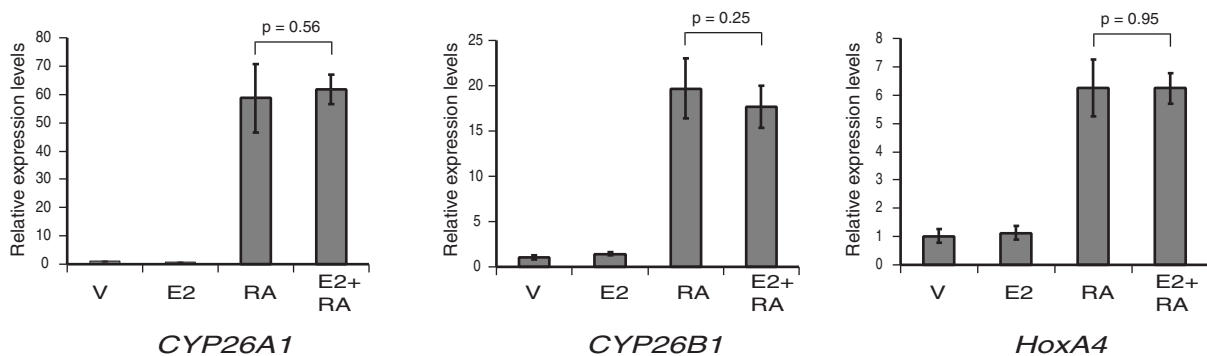

Fig. S7

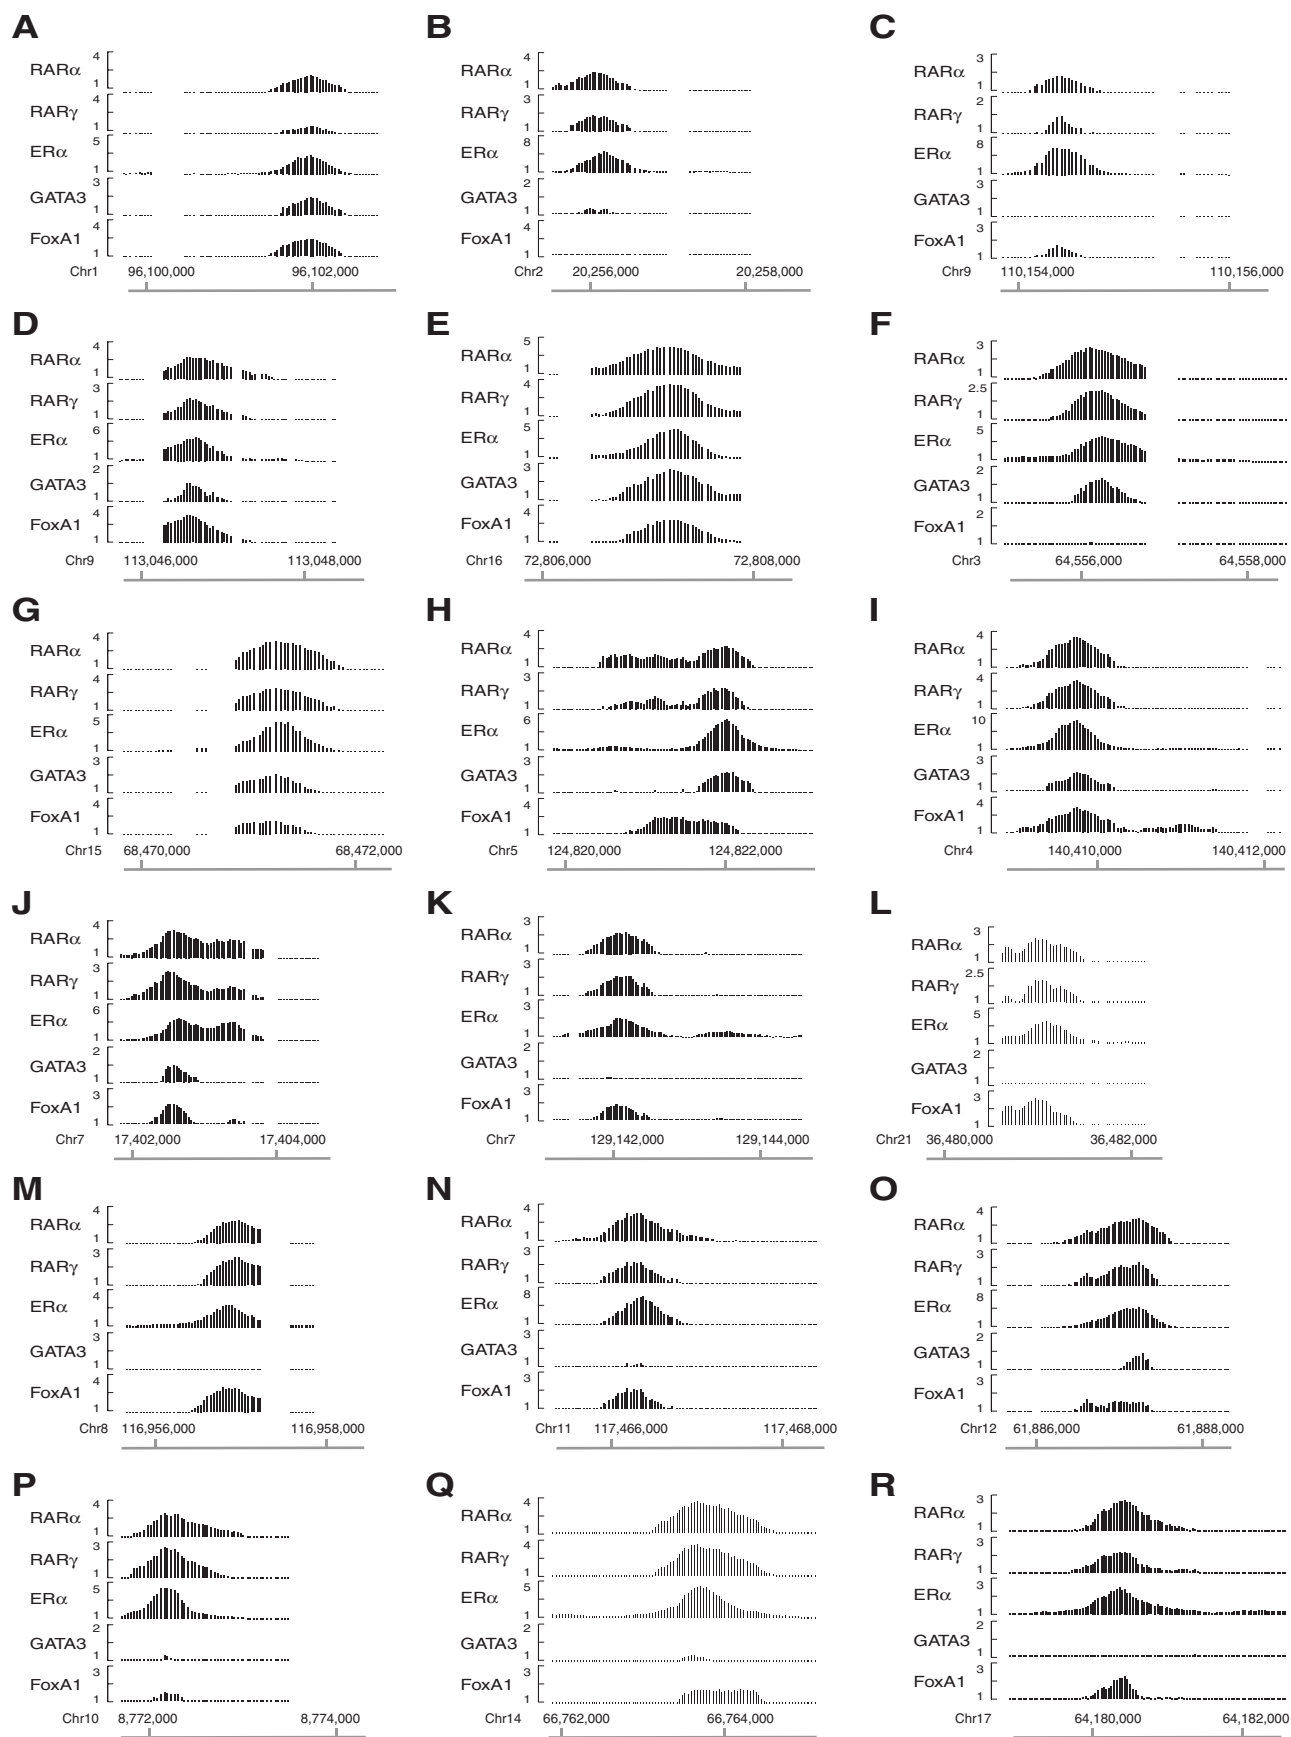

**Fig. S8**

**RAR direct targets only**

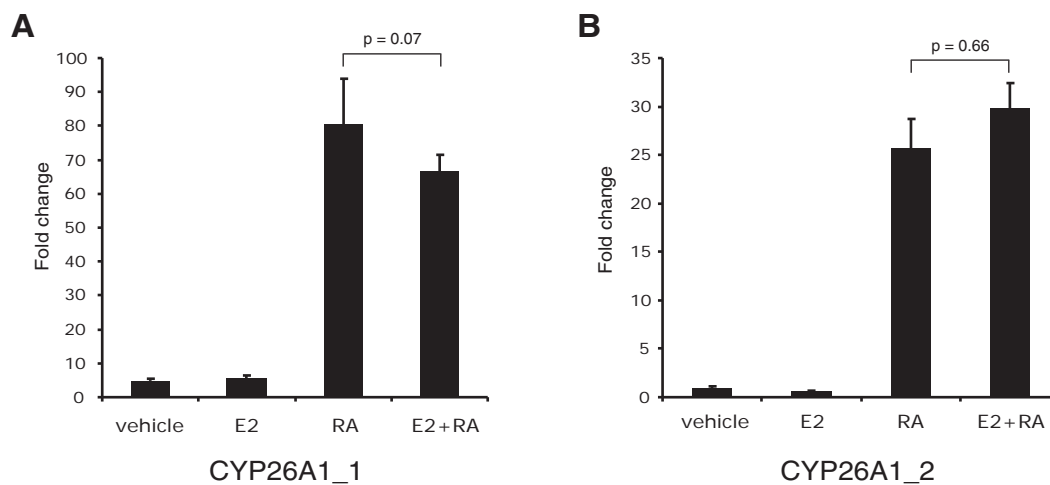

**RAR and ER $\alpha$  common targets (E2 down-regulated, RA up-regulated)**

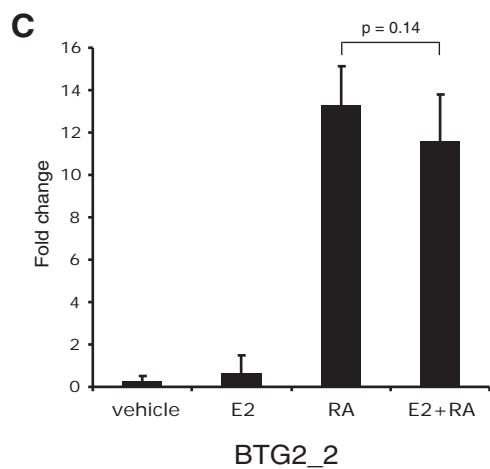

**RAR and ER $\alpha$  common targets (E2 up-regulated, RA down-regulated)**

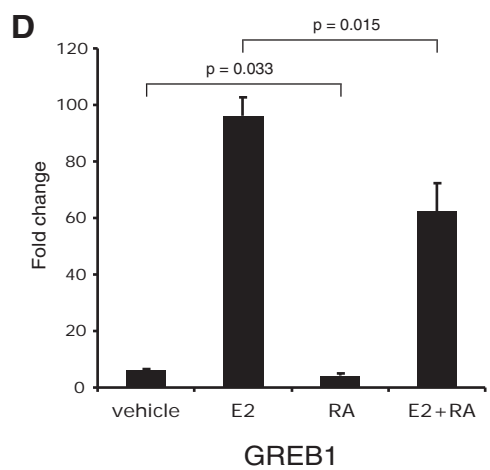



Fig. S9

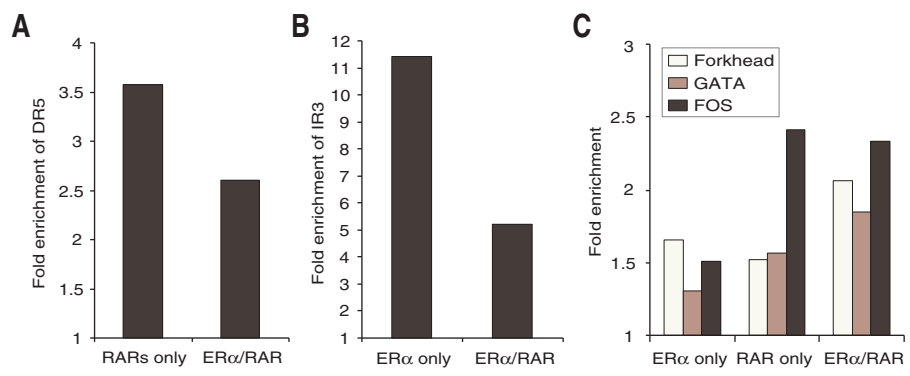

Fig. S10

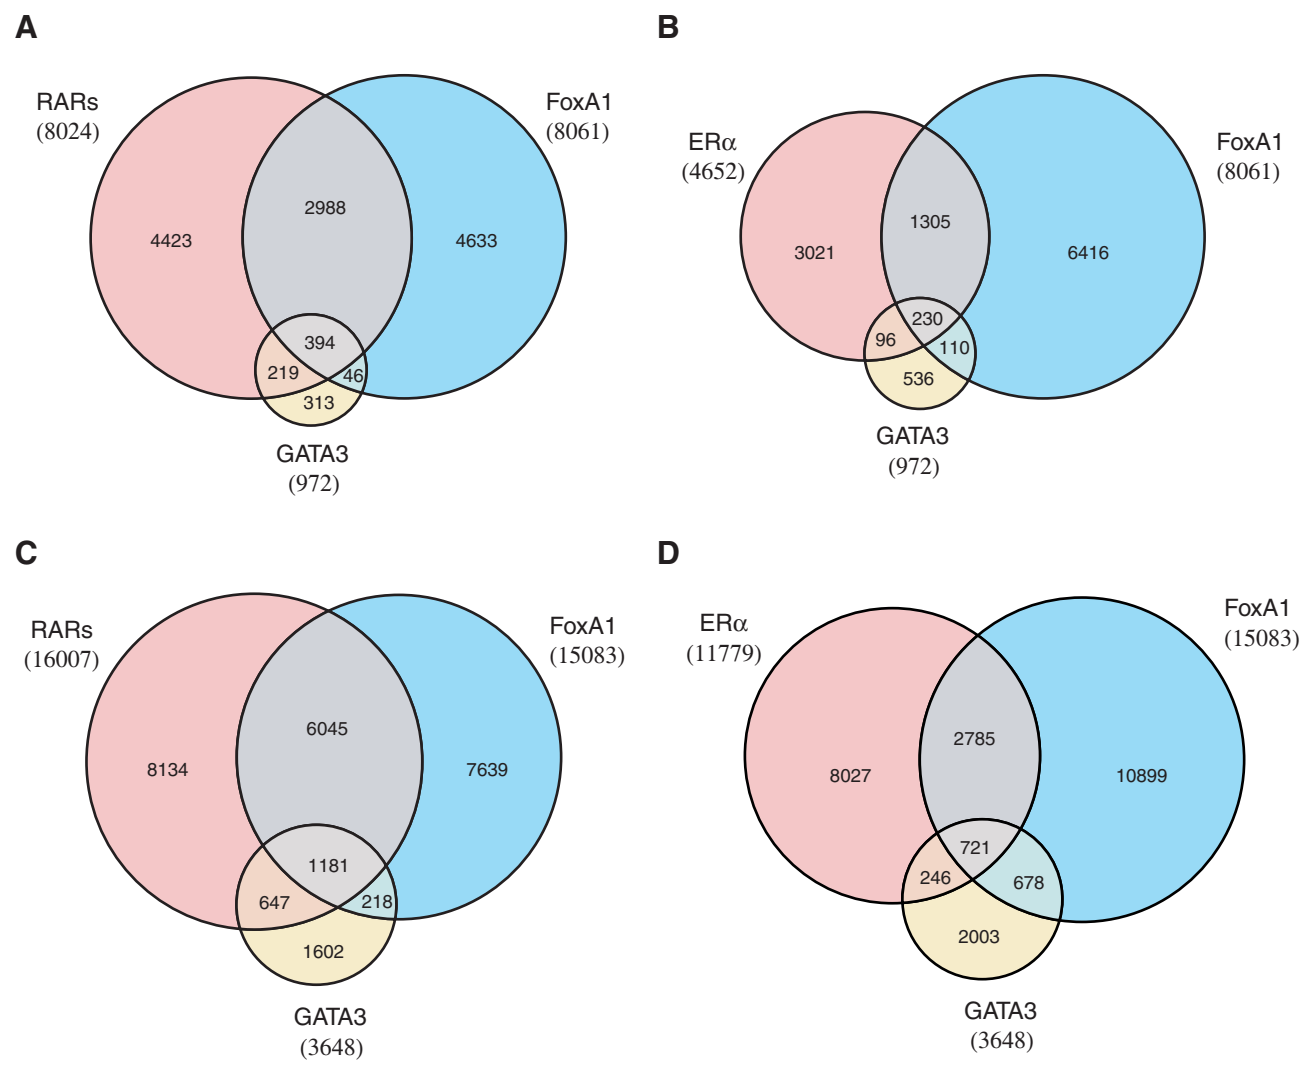

Fig. S11

**A**

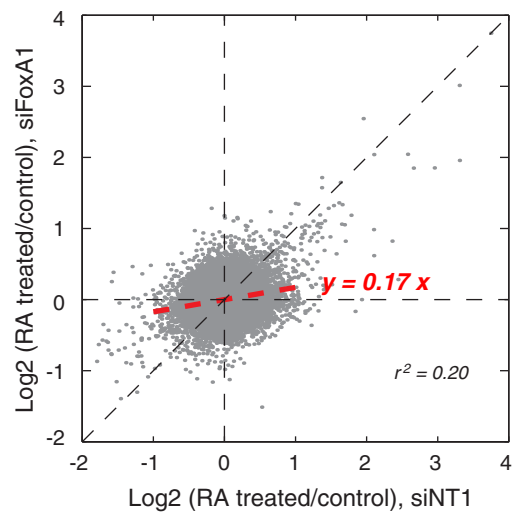

**B**

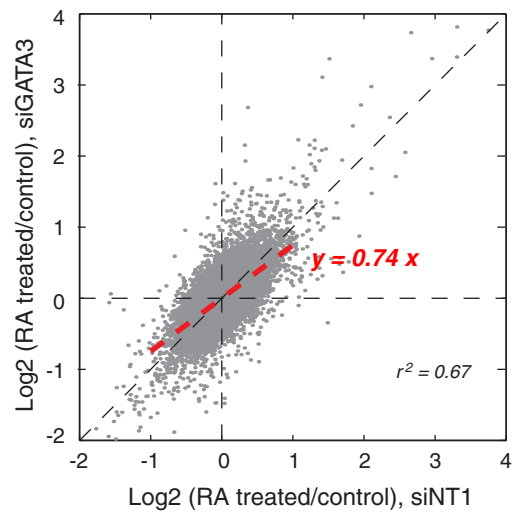

Fig. S12

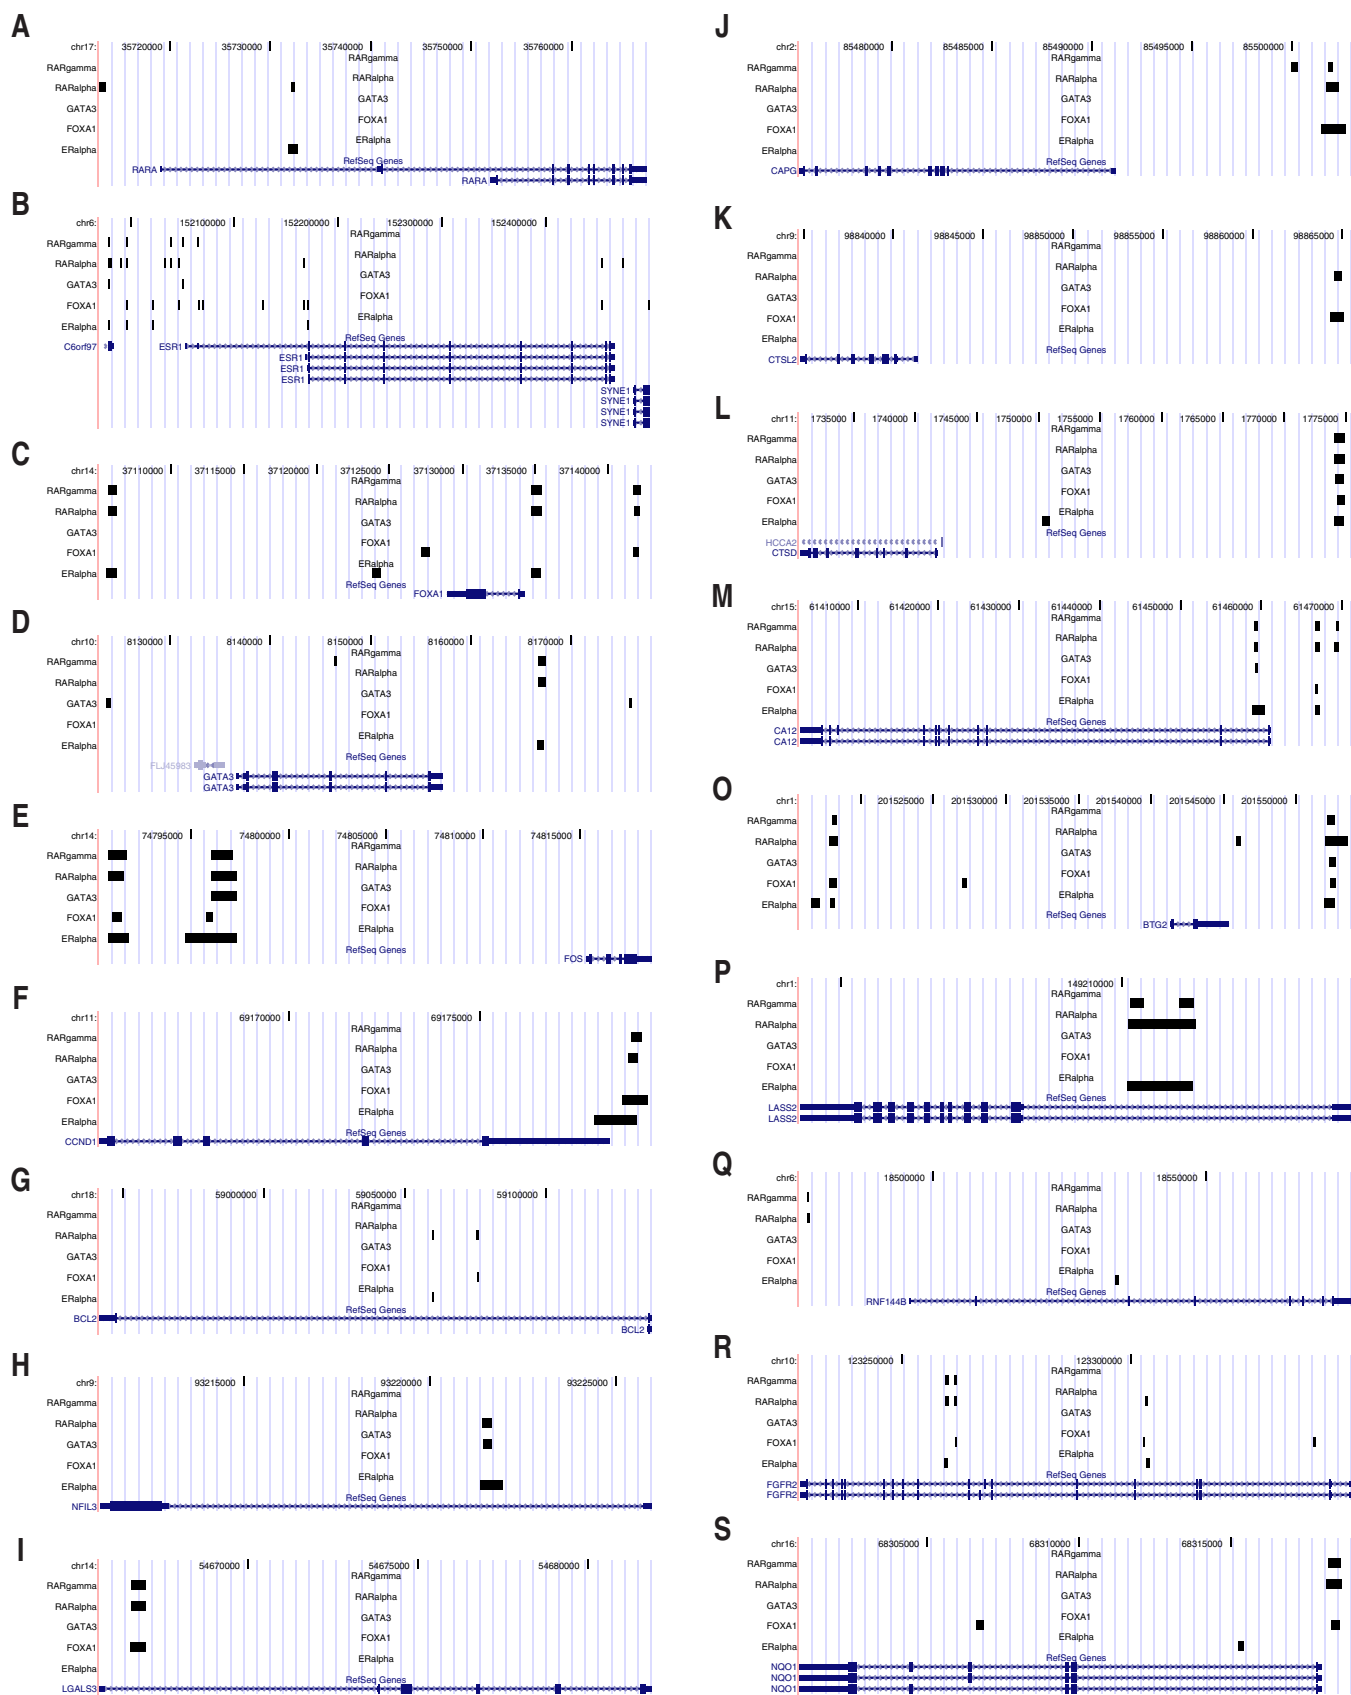

Fig. S13

A

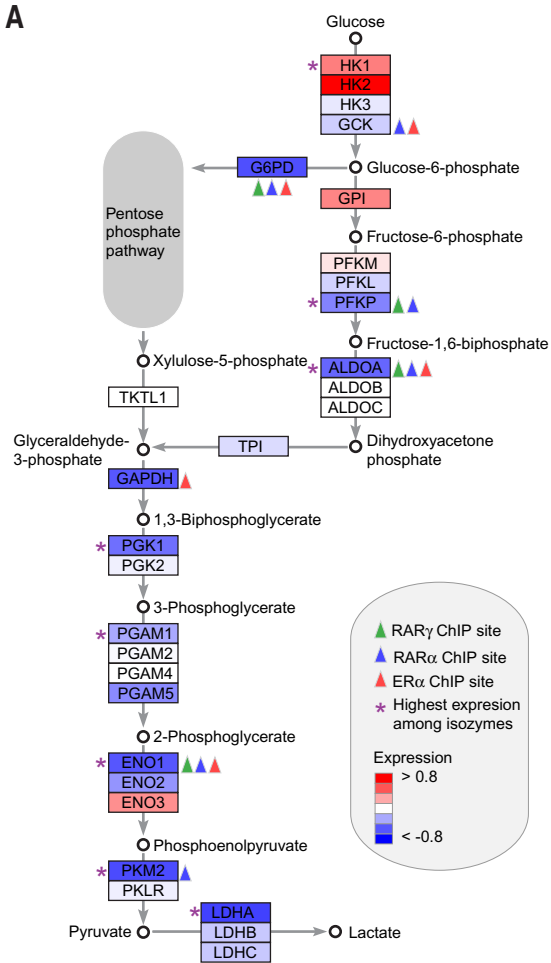

B

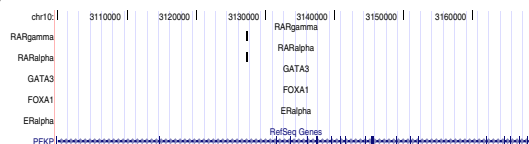

C

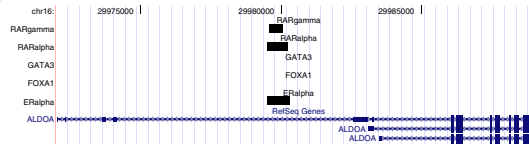

D

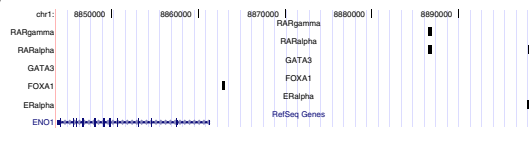

E

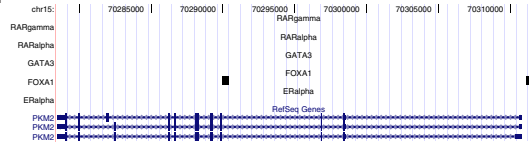

F

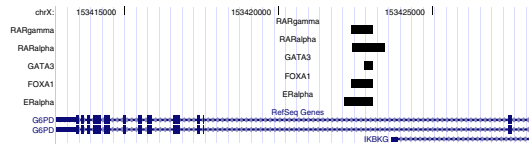

Fig. S14

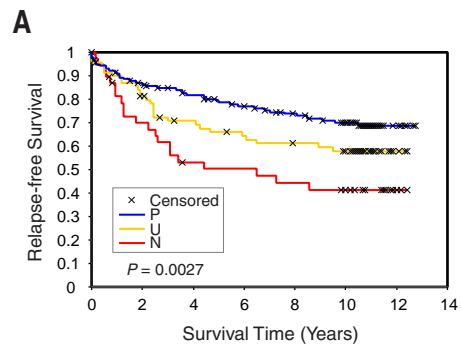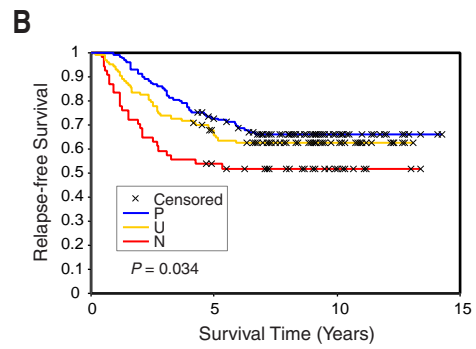

Fig. S15

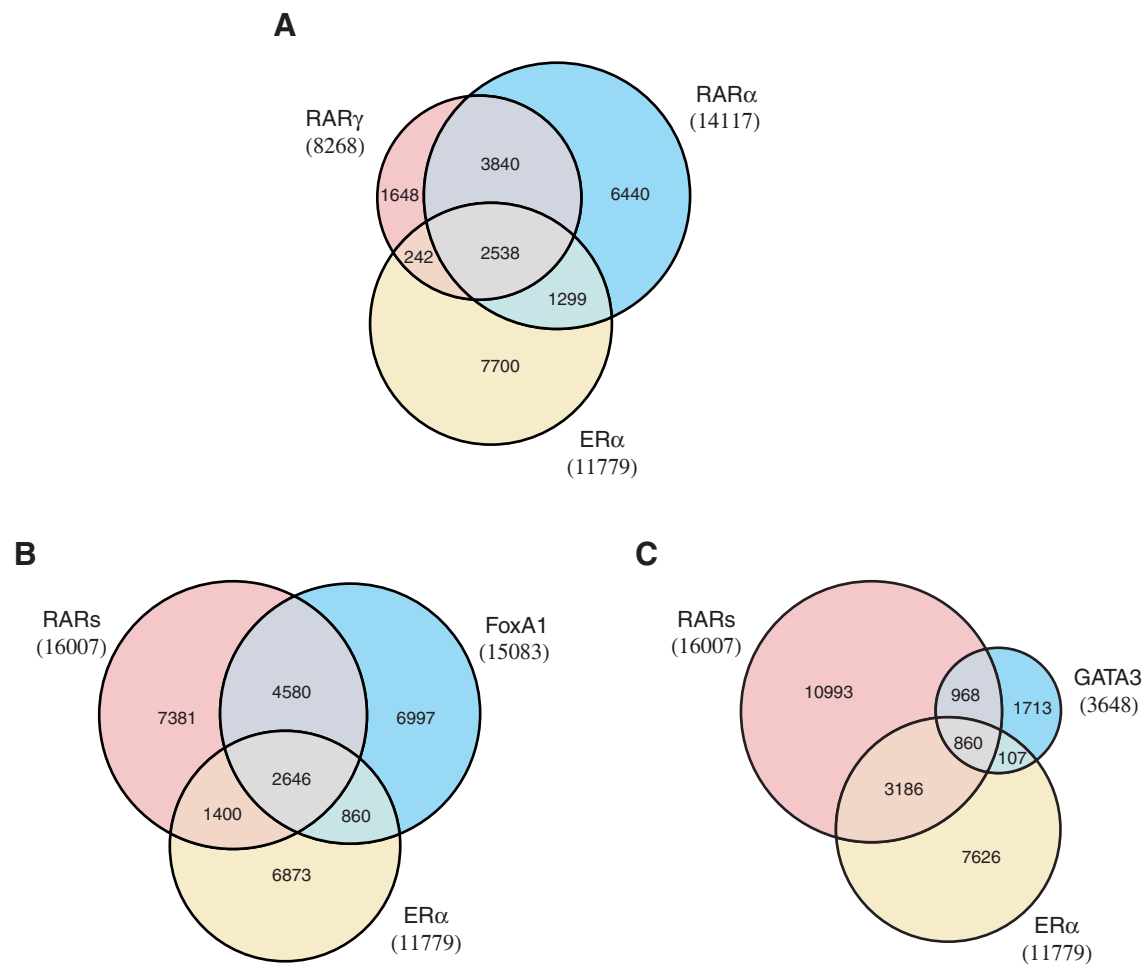

Supplement: NIHMS246995-supplement-09.pdf [file NIHMS246995-supplement-09.pdf]
